# Supplementary material for: Complete Chloroplast Genome of Cercis chuniana (Fabaceae) with Structural and Genetic Comparison to Six Species in Caesalpinioideae
Source: PubMed Central journal article supplement (PMC5983592; doi:10.3390/ijms19051286), 2018-04-25
Supplement: ijms-19-01286-s001.pdf [file ijms-19-01286-s001.pdf]

# Supplementary Materials: Complete Chloroplast Genome of *Cercis chuniana* (Fabaceae) with Structural and Genetic Comparison to Six Species in Caesalpinioideae

Wanzhen Liu, Hanghui Kong, Juan Zhou, Peter W. Fritsch, Gang Hao and Wei Gong

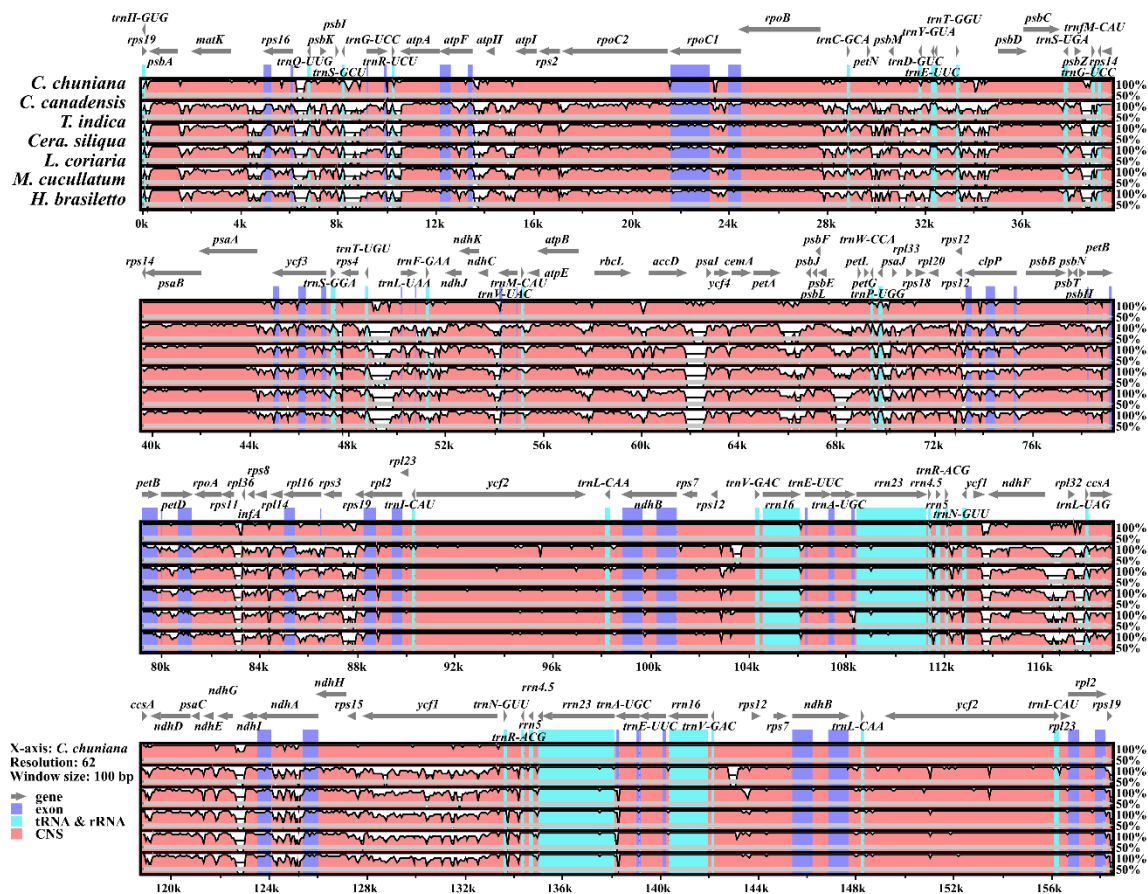

**Figure S1.** Structure comparison of the cp genomes in seven species of Fabaceae with mVISTA.

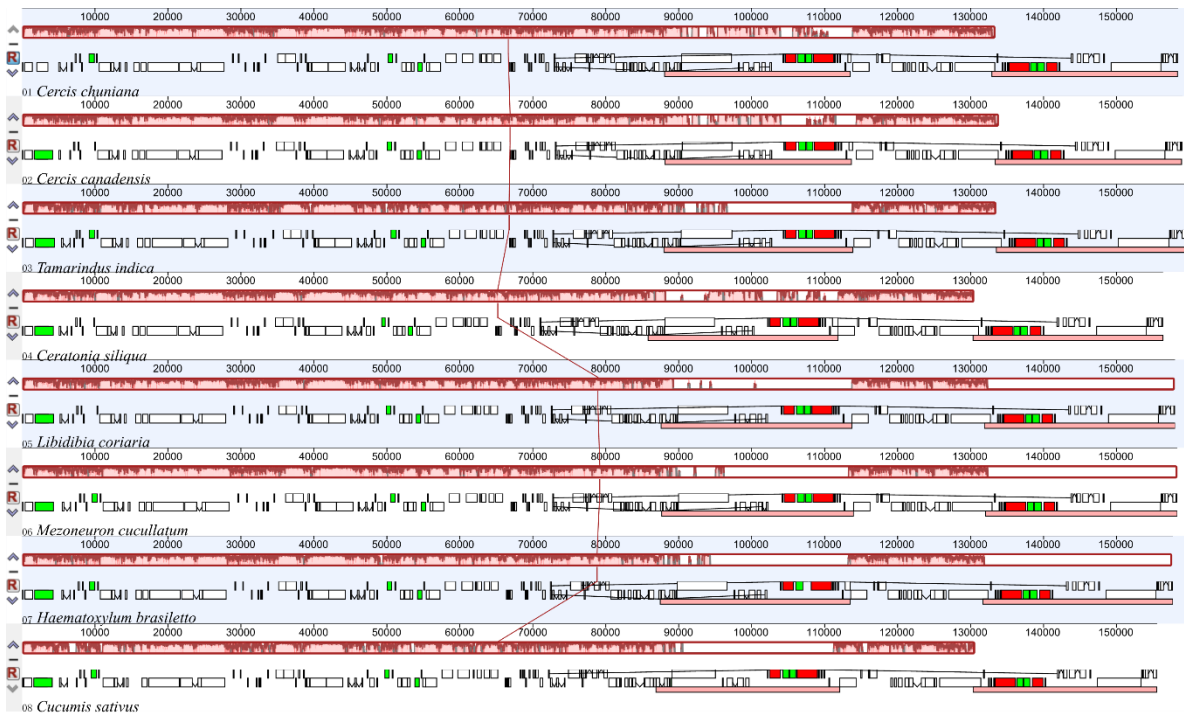

Figure S2. Mauve analysis for the cp genomes in seven species of Fabaceae.

**Table S1.** List of genes present in the *C. chuniana* cp genome.

| Category                     | Gene Group                 | Gene Name                 |                                 |                               |                               |                                 |              |
|------------------------------|----------------------------|---------------------------|---------------------------------|-------------------------------|-------------------------------|---------------------------------|--------------|
| Self-replication             | rRNA genes                 | <i>rrn16</i> <sup>a</sup> | <i>rrn23</i> <sup>a</sup>       | <i>rrn4.5</i> <sup>a</sup>    | <i>rrn5</i> <sup>a</sup>      |                                 |              |
|                              | tRNA genes                 |                           | <i>trnA</i> -UGC <sup>a,b</sup> | <i>trnC</i> -GCA              | <i>trnD</i> -GUC              | <i>trnE</i> -UUC <sup>a,b</sup> |              |
|                              |                            |                           | <i>trnF</i> -GAA                | <i>trnI</i> -CAU              | <i>trnG</i> -UCC <sup>b</sup> | <i>trnH</i> -GUG                |              |
|                              |                            |                           | <i>trnI</i> -CAU <sup>a</sup>   | <i>trnK</i> -UUU <sup>b</sup> | <i>trnL</i> -CAA <sup>a</sup> | <i>trnL</i> -UAA <sup>b</sup>   |              |
|                              |                            |                           | <i>trnL</i> -UAG                | <i>trnM</i> -CAU              | <i>trnN</i> -GUU <sup>a</sup> | <i>trnP</i> -UGG                |              |
|                              |                            |                           | <i>trnQ</i> -UUG                | <i>trnR</i> -ACG <sup>a</sup> | <i>trnR</i> -UCU              | <i>trnS</i> -GCU                |              |
|                              |                            |                           | <i>trnS</i> -GGA                | <i>trnS</i> -UGA              | <i>trnT</i> -GGU              | <i>trnT</i> -UGU                |              |
|                              |                            |                           | <i>trnV</i> -GAC <sup>a</sup>   | <i>trnV</i> -UAC <sup>b</sup> | <i>trnW</i> -CCA              | <i>trnY</i> -GUA                |              |
|                              |                            | Small subunit of ribosome |                                 | <i>rps11</i>                  | <i>rps12</i> <sup>a,d</sup>   | <i>rps14</i>                    | <i>rps15</i> |
|                              |                            |                           |                                 | <i>rps16</i> <sup>b</sup>     | <i>rps18</i>                  | <i>rps19</i> <sup>a</sup>       | <i>rps2</i>  |
|                              |                            | Large subunit of ribosome |                                 | <i>rps3</i>                   | <i>rps4</i>                   | <i>rps7</i> <sup>a</sup>        | <i>rps8</i>  |
|                              |                            |                           | <i>rpl2</i> <sup>a,b</sup>      | <i>rpl14</i>                  | <i>rpl16</i> <sup>b</sup>     | <i>rpl20</i>                    |              |
| DNA-dependent RNA polymerase |                            | <i>rpl23</i> <sup>a</sup> | <i>rpl32</i>                    | <i>rpl33</i>                  | <i>rpl36</i>                  |                                 |              |
|                              |                            | <i>rpoA</i>               | <i>rpoB</i>                     | <i>rpoC1</i> <sup>b</sup>     | <i>rpoC2</i>                  |                                 |              |
| Genes for photosynthesis     | Subunits of Photosystem I  | <i>psaA</i>               | <i>psaB</i>                     | <i>psaC</i>                   | <i>psaI</i>                   |                                 |              |
|                              |                            | <i>psaJ</i>               | <i>ycf3</i> <sup>c</sup>        | <i>ycf4</i>                   |                               |                                 |              |
|                              | Subunits of Photosystem II | <i>psbA</i>               | <i>psbB</i>                     | <i>psbC</i>                   | <i>psbD</i>                   |                                 |              |
|                              |                            | <i>psbE</i>               | <i>psbF</i>                     | <i>psbH</i>                   | <i>psbI</i>                   |                                 |              |
|                              |                            | <i>psbJ</i>               | <i>psbK</i>                     | <i>psbL</i>                   | <i>psbM</i>                   |                                 |              |
|                              |                            | <i>psbN</i>               | <i>psbT</i>                     | <i>psbZ</i>                   |                               |                                 |              |
|                              | Subunits of cytochrome     | <i>petA</i>               | <i>petB</i> <sup>b</sup>        | <i>petD</i> <sup>b</sup>      | <i>petG</i>                   |                                 |              |
|                              |                            | <i>petL</i>               | <i>petN</i>                     |                               |                               |                                 |              |
|                              | Subunits of ATP synthase   | <i>atpA</i>               | <i>atpB</i>                     | <i>atpE</i>                   | <i>atpF</i> <sup>b</sup>      |                                 |              |
|                              |                            | <i>atpH</i>               | <i>atpI</i>                     |                               |                               |                                 |              |
|                              | Large subunit of Rubisco   | <i>rbcL</i>               |                                 |                               |                               |                                 |              |

|                                |                                     |                            |                          |             |
|--------------------------------|-------------------------------------|----------------------------|--------------------------|-------------|
|                                | <i>ndhA</i> <sup>b</sup>            | <i>ndhB</i> <sup>a,b</sup> | <i>ndhC</i>              | <i>ndhD</i> |
| Subunits of NADH dehydrogenase | <i>ndhE</i>                         | <i>ndhF</i>                | <i>ndhG</i>              | <i>ndhH</i> |
|                                | <i>ndhI</i>                         | <i>ndhJ</i>                | <i>ndhK</i>              |             |
| Other genes                    | Maturase                            |                            | <i>matK</i>              |             |
|                                | Envelope membrane protein           |                            | <i>cemA</i>              |             |
|                                | Subunit of acetyl-CoA               |                            | <i>accD</i>              |             |
|                                | C-type cytochrome<br>Synthesis gene |                            | <i>ccsA</i>              |             |
|                                | Protease                            |                            | <i>clpP</i> <sup>c</sup> |             |
|                                | Component of TIC complex            |                            | <i>ycf1</i> <sup>a</sup> |             |
|                                | Function unknown                    |                            | <i>ycf2</i> <sup>a</sup> |             |
|                                | Translation initiation factor       |                            | <i>infA</i>              |             |

a: Two gene copies in IR regions; b: gene containing a single intron; c: gene containing two introns; d: gene divided into two independent transcription units.

**Table S2.** Number and frequency of classified repeat types in the cp genomes of *C. chuniana* and related species.

| Repeats              | Compound SSR | A/T       | C/G      | AT/TA    | TAA/TTA     | TTAA          | TTTA/AAAT     | Total SSRs |
|----------------------|--------------|-----------|----------|----------|-------------|---------------|---------------|------------|
| <i>C. chuniana</i>   | 18 (19.8)    | 69 (94.5) | -        | 1 (1.37) | 2 (2.74)    | -             | 1 (1.37)      | 91         |
| <i>C. canadensis</i> | 20 (22.0)    | 67 (94.4) | 1 (1.41) | 3 (4.23) | -           | -             | -             | 91         |
| <i>T. indica</i>     | 12 (14.1)    | 60 (82.2) | 4 (5.48) | 7 (9.59) | -           | 1 (1.37)      | 1 (1.37)      | 85         |
| <i>Cera. siliqua</i> | 13 (17.1)    | 61 (96.8) | -        | 2 (3.17) | -           | -             | -             | 76         |
| <i>L. coriaria</i>   | 12 (18.2)    | 53 (98.2) | -        | -        | 1 (1.85)    | -             | -             | 66         |
| <i>M. cucullatum</i> | 13 (16.5)    | 65 (98.5) | -        | 1 (1.52) | -           | -             | -             | 79         |
| <i>H. brasiletto</i> | 2 (5.26)     | 35 (97.2) | 1 (2.78) | -        | -           | -             | -             | 38         |
| Average              | 13 (17.1)    | 59 (78.1) | 1 (1.14) | 2 (2.67) | 0.43 (0.57) | 0.14 (0.196%) | 0.29 (0.391%) | 75         |

Numbers in parentheses = each repeat type number/total repeat type number × 100.

**Table S3.** SSR primers of the *C. chuni* cp genome designed by Primer3 (1.1.1-WINXP).

| No. | SSR   | DIR | F/R PRIMER1 (5'-3')       | Tm (°C) | PRO Size (bp) | Start (bp) | End (bp) |
|-----|-------|-----|---------------------------|---------|---------------|------------|----------|
| 1   | (A)12 | F   | CAGGATACAATCGCAATCAAAC    | 60.377  | 279           | 4301       | 4579     |
|     |       | R   | TTTTTGGTTTTCGCCATTG       | 59.524  |               |            |          |
| 2   |       | F   | TCAAAATGAACAGATCAGATCAAAA | 59.997  | 175           | 4405       | 4579     |
|     |       | R   | TTTTTGGTTTTCGCCATTGT      | 60.335  |               |            |          |
| 3   |       | F   | TCAGGATACAATCGCAATCAA     | 59.126  | 272           | 4300       | 4571     |
|     |       | R   | TTTCGCCATTGTAGTCTTTTCTT   | 59.341  |               |            |          |
| 4   | (T)12 | F   | ACAATGGCGAAAACCAAAAA      | 60.335  | 179           | 4560       | 4738     |
|     |       | R   | TTACCCTCAATGAGTTGGGAA     | 59.415  |               |            |          |
| 5   |       | F   | ACAATGGCGAAAACCAAAAA      | 60.335  | 181           | 4560       | 4740     |
|     |       | R   | CATTACCCTCAATGAGTTGGG     | 59.298  |               |            |          |
| 6   |       | F   | ACAATGGCGAAAACCAAAAA      | 60.335  | 177           | 4560       | 4736     |
|     |       | R   | ACCCTCAATGAGTTGGGAAT      | 58.297  |               |            |          |
| 7   | (T)13 | F   | GAGCAAGAGAGAGGAAGGGG      | 60.468  | 201           | 4898       | 5098     |
|     |       | R   | AAAAAGGCGCTCAACCTACA      | 59.883  |               |            |          |
| 8   |       | F   | GAGCAAGAGAGAGGAAGGGG      | 60.468  | 210           | 4898       | 5107     |
|     |       | R   | ATTCCTTGAAAAAGGCGCT       | 60.204  |               |            |          |
| 9   |       | F   | GAGCAAGAGAGAGGAAGGGG      | 60.468  | 200           | 4898       | 5097     |
|     |       | R   | AAAAGGCGCTCAACCTACAG      | 59.517  |               |            |          |
| 10  | (T)12 | F   | CGTTGCTTTCTACCACATCG      | 59.342  | 207           | 6086       | 6292     |
|     |       | R   | AATTTGAATTTTTGCCGAAAC     | 58.164  |               |            |          |
| 11  |       | F   | ACGTTGCTTTCTACCACATCG     | 60.183  | 208           | 6085       | 6292     |
|     |       | R   | AATTTGAATTTTTGCCGAAAC     | 58.164  |               |            |          |
| 12  |       | F   | CGTTGCTTTCTACCACATCGT     | 60.183  | 207           | 6086       | 6292     |
|     |       | R   | AATTTGAATTTTTGCCGAAAC     | 58.164  |               |            |          |
| 13  | (A)12 | F   | AAGTGACTCGATTTAGGGACGA    | 60.13   | 196           | 6582       | 6777     |
|     |       | R   | CTTCCGTCCCAGAGCATATC      | 59.653  |               |            |          |

|    |                                              |   |                          |        |     |       |       |
|----|----------------------------------------------|---|--------------------------|--------|-----|-------|-------|
| 14 |                                              | F | AGTGACTCGATTTAGGGACGA    | 58.803 | 195 | 6583  | 6777  |
|    |                                              | R | CTTCCGTCCCAGAGCATATC     | 59.653 |     |       |       |
| 15 |                                              | F | CTCGATTTAGGGACGAATCA     | 57.765 | 190 | 6588  | 6777  |
|    |                                              | R | CTTCCGTCCCAGAGCATATC     | 59.653 |     |       |       |
| 16 | (T)11                                        | F | TCGATTTCTCGAAAGCACTTC    | 59.583 | 223 | 7776  | 7998  |
|    |                                              | R | TTCTTCACGTCCCGGATTAC     | 59.933 |     |       |       |
| 17 |                                              | F | CGATTTCTCGAAAGCACTTCA    | 60.508 | 222 | 7777  | 7998  |
|    |                                              | R | TTCTTCACGTCCCGGATTAC     | 59.933 |     |       |       |
| 18 |                                              | F | TTTCGATTTCTCGAAAGCACT    | 59.101 | 225 | 7774  | 7998  |
|    |                                              | R | TTCTTCACGTCCCGGATTAC     | 59.933 |     |       |       |
| 19 | (A)10                                        | F | TGCTTTTCCTAAGGATTCTTTCA  | 59.403 | 229 | 9615  | 9843  |
|    |                                              | R | CCGAACGTGAAACTTTGGTT     | 60.008 |     |       |       |
| 20 |                                              | F | TGCTTTTCCTAAGGATTCTTTCA  | 59.403 | 231 | 9615  | 9845  |
|    |                                              | R | AACCGAACGTGAAACTTTGG     | 60.008 |     |       |       |
| 21 |                                              | F | TGATTAAAGGATCCATGGCTAAA  | 59.824 | 267 | 9449  | 9715  |
|    |                                              | R | ACACCCCGCTTTTTAGATGA     | 59.569 |     |       |       |
| 22 | (T)10ctagaatctataaaaatcgtggattttgatattaat    | F | TGAATTGAACGAGAGACGCTT    | 60.008 | 280 | 10345 | 10624 |
|    | tactaattatattattatatttttattcctaattcttaagaatt | R | TGGAACTCTTTTTACTTCAGGAAC | 58.082 |     |       |       |
| 23 | aggaataaaaaatag(T)11                         | F | TGAATTGAACGAGAGACGCT     | 58.597 | 280 | 10345 | 10624 |
|    |                                              | R | TGGAACTCTTTTTACTTCAGGAAC | 58.082 |     |       |       |
| 24 |                                              | F | TGAATTGAACGAGAGACGCTTA   | 60.018 | 280 | 10345 | 10624 |
|    |                                              | R | TGGAACTCTTTTTACTTCAGGAAC | 58.082 |     |       |       |
| 25 | (A)11                                        | F | CACCTGCCATTACCTCATCA     | 59.522 | 245 | 11963 | 12207 |
|    |                                              | R | TGGGGCGATGAAAGAAATAA     | 60.395 |     |       |       |
| 26 |                                              | F | CACCTGCCATTACCTCATCA     | 59.522 | 246 | 11963 | 12208 |
|    |                                              | R | TTGGGGCGATGAAAGAAATA     | 60.395 |     |       |       |
| 27 |                                              | F | TCATCTGCCCGAATGGTTAC     | 60.864 | 253 | 12094 | 12346 |
|    |                                              | R | ATTTTGAACAACAAAGGGCG     | 59.975 |     |       |       |
| 28 | (T)11                                        | F | ACATAGGTCATCGATTCCGC     | 59.923 | 212 | 12891 | 13102 |

|    |                                                                |   |                            |        |     |       |       |
|----|----------------------------------------------------------------|---|----------------------------|--------|-----|-------|-------|
|    |                                                                | R | AGACGCAGCGTGGTACTCTT       | 60.081 |     |       |       |
| 29 |                                                                | F | ACATAGGTCATCGATTCCGC       | 59.923 | 218 | 12891 | 13108 |
|    |                                                                | R | AAGTCTAGACGCAGCGTGGT       | 60.081 |     |       |       |
| 30 |                                                                | F | TAGGTCATCGATTCCGCATT       | 60.435 | 209 | 12894 | 13102 |
|    |                                                                | R | AGACGCAGCGTGGTACTCTT       | 60.081 |     |       |       |
| 31 | (T)12attcagaagtaattcgcgggatcatgcacctttat<br>cctagttataacg(A)11 | F | AAGAGTACCACGCTGCGTCT       | 60.081 | 270 | 13083 | 13352 |
|    |                                                                | R | AAAGGGAGTGTGTGCGAGTT       | 59.769 |     |       |       |
| 32 |                                                                | F | AAGAGTACCACGCTGCGTCT       | 60.081 | 271 | 13083 | 13353 |
|    |                                                                | R | GAAAGGGAGTGTGTGCGAGT       | 60.307 |     |       |       |
| 33 |                                                                | F | AAGAGTACCACGCTGCGTCT       | 60.081 | 268 | 13083 | 13350 |
|    |                                                                | R | AGGGAGTGTGTGCGAGTTGT       | 60.779 |     |       |       |
| 34 | (TTA)5                                                         | F | TTTTTCATATGATCTCATCTCCTCTT | 58.774 | 279 | 13479 | 13757 |
|    |                                                                | R | TATGGGAAATCCTCCAAAAA       | 57.022 |     |       |       |
| 35 |                                                                | F | TTTTCATATGATCTCATCTCCTCTT  | 57.539 | 278 | 13480 | 13757 |
|    |                                                                | R | TATGGGAAATCCTCCAAAAA       | 57.022 |     |       |       |
| 36 |                                                                | F | TTTTTCATATGATCTCATCTCCTCT  | 57.539 | 279 | 13479 | 13757 |
|    |                                                                | R | TATGGGAAATCCTCCAAAAA       | 57.022 |     |       |       |
| 37 | (A)10                                                          | F | TGGAGGATTTCCCATAAAAATG     | 60.016 | 188 | 13742 | 13929 |
|    |                                                                | R | GCCTTCTTCCTTCCCTTTTG       | 60.18  |     |       |       |
| 38 |                                                                | F | TTTGGAGGATTTCCCATAAAAA     | 59.667 | 190 | 13740 | 13929 |
|    |                                                                | R | GCCTTCTTCCTTCCCTTTTG       | 60.18  |     |       |       |
| 39 |                                                                | F | TTGGAGGATTTCCCATAAAAA      | 58.412 | 189 | 13741 | 13929 |
|    |                                                                | R | GCCTTCTTCCTTCCCTTTTG       | 60.18  |     |       |       |
| 40 | (A)10taaaatataaaa(AT)6                                         | F | AAAAGCAAGAGCAGCAAAGC       | 59.911 | 242 | 14030 | 14271 |
|    |                                                                | R | CAAGGTAAGTGCAGGTCA         | 60.049 |     |       |       |
| 41 |                                                                | F | AAAAGCAAGAGCAGCAAAGC       | 59.911 | 268 | 14030 | 14297 |
|    |                                                                | R | TTGCTTCTATTGGACCTGGG       | 60.066 |     |       |       |
| 42 |                                                                | F | AAAAGCAAGAGCAGCAAAGC       | 59.911 | 190 | 14030 | 14219 |
|    |                                                                | R | CAGAGGGAAAAATACGGGGT       | 60.18  |     |       |       |

|    |                             |   |                      |        |     |       |       |
|----|-----------------------------|---|----------------------|--------|-----|-------|-------|
| 43 | (T)12                       | F | CCCCACTCCTACCCTATTT  | 59.167 | 211 | 14838 | 15048 |
|    |                             | R | ACGAATTTGGATTTCCCTCC | 60.131 |     |       |       |
| 44 |                             | F | CCCCACTCCTACCCTATTT  | 59.167 | 206 | 14838 | 15043 |
|    |                             | R | TTTGGATTTCCCTCCAATGA | 60.244 |     |       |       |
| 45 |                             | F | CCCCACTCCTACCCTATTT  | 59.167 | 205 | 14838 | 15042 |
|    |                             | R | TTGGATTTCCCTCCAATGAA | 60.244 |     |       |       |
| 46 | (T)10                       | F | GGAGGGAAATCCAAATTCGT | 60.131 | 246 | 15029 | 15274 |
|    |                             | R | GTGTGTGCGGCTCAAGATAA | 59.871 |     |       |       |
| 47 |                             | F | TCATTGGAGGGAAATCCAAA | 60.244 | 251 | 15024 | 15274 |
|    |                             | R | GTGTGTGCGGCTCAAGATAA | 59.871 |     |       |       |
| 48 |                             | F | GGGAAATCCAAATTCGTCAA | 59.739 | 243 | 15032 | 15274 |
|    |                             | R | GTGTGTGCGGCTCAAGATAA | 59.871 |     |       |       |
| 49 | (T)12caaattctttttatttg(A)10 | F | ATGGCCAAAATGAACTCCTG | 59.933 | 225 | 16934 | 17158 |
|    |                             | R | AAAAATGAATGGCCTGATCG | 59.901 |     |       |       |
| 50 |                             | F | CATGGCCAAAATGAACTCCT | 59.933 | 226 | 16933 | 17158 |
|    |                             | R | AAAAATGAATGGCCTGATCG | 59.901 |     |       |       |
| 51 |                             | F | ACCATGGCCAAAATGAACTC | 59.797 | 228 | 16931 | 17158 |
|    |                             | R | AAAAATGAATGGCCTGATCG | 59.901 |     |       |       |
| 52 | (T)12                       | F | AATCCCCGAATTGGTTTTTC | 59.999 | 279 | 18934 | 19212 |
|    |                             | R | ATATCCCGACACAGTGGCAT | 60.226 |     |       |       |
| 53 |                             | F | ACAGATCCTGGGGGAAAAGT | 59.795 | 202 | 19011 | 19212 |
|    |                             | R | ATATCCCGACACAGTGGCAT | 60.226 |     |       |       |
| 54 |                             | F | AACAGATCCTGGGGGAAAAG | 60.298 | 203 | 19010 | 19212 |
|    |                             | R | ATATCCCGACACAGTGGCAT | 60.226 |     |       |       |
| 55 | (A)11                       | F | ACTTCGCCTCGATGGTTATG | 60.096 | 178 | 23619 | 23796 |
|    |                             | R | TATAGCGGTACCTCGCGAAA | 60.73  |     |       |       |
| 56 |                             | F | GGTTATGCCACGATGTCCTT | 59.82  | 165 | 23632 | 23796 |
|    |                             | R | TATAGCGGTACCTCGCGAAA | 60.73  |     |       |       |
| 57 |                             | F | ACTTCGCCTCGATGGTTATG | 60.096 | 222 | 23619 | 23840 |



|    |       |   |                          |        |     |       |       |
|----|-------|---|--------------------------|--------|-----|-------|-------|
|    |       | R | GGGAATTGGTCTATGGTCGAT    | 60.032 |     |       |       |
| 58 | (T)10 | F | CGTCGACCAATCCTTCCTAA     | 60.066 | 204 | 26880 | 27083 |
|    |       | R | GAATGTTTGCTACCCCGAAA     | 59.938 |     |       |       |
| 59 |       | F | CGTCGACCAATCCTTCCTAA     | 60.066 | 206 | 26880 | 27085 |
|    |       | R | GAGAATGTTTGCTACCCCGA     | 60.074 |     |       |       |
| 60 |       | F | CTCCGCCTACACAAGCAAAT     | 60.27  | 119 | 26965 | 27083 |
|    |       | R | GAATGTTTGCTACCCCGAAA     | 59.938 |     |       |       |
| 61 | (A)10 | F | CCTAACTCCGGATATGGAATG    | 58.405 | 241 | 27795 | 28035 |
|    |       | R | TCATCGAACAGATCAAATCTCG   | 60.214 |     |       |       |
| 62 |       | F | ACCTAACTCCGGATATGGAATG   | 59.223 | 242 | 27794 | 28035 |
|    |       | R | TCATCGAACAGATCAAATCTCG   | 60.214 |     |       |       |
| 63 |       | F | TCCGGATATGGAATGTATGAAA   | 59.147 | 235 | 27801 | 28035 |
|    |       | R | TCATCGAACAGATCAAATCTCG   | 60.214 |     |       |       |
| 64 | (T)10 | F | TCACGGATTCAATTGTTCAAA    | 59.002 | 210 | 28090 | 28299 |
|    |       | R | GAACGAAGGGCTCCAATACA     | 60.074 |     |       |       |
| 65 |       | F | TCACGGATTCAATTGTTCAAAA   | 60.335 | 210 | 28090 | 28299 |
|    |       | R | GAACGAAGGGCTCCAATACA     | 60.074 |     |       |       |
| 66 |       | F | TTCACGGATTCAATTGTTCAAA   | 60.335 | 211 | 28089 | 28299 |
|    |       | R | GAACGAAGGGCTCCAATACA     | 60.074 |     |       |       |
| 67 | (T)11 | F | GAAGCACGATAATTTCCCGA     | 60.038 | 249 | 28367 | 28615 |
|    |       | R | CATGAACGATTCTTGGATTTGA   | 59.938 |     |       |       |
| 68 |       | F | GAAGCACGATAATTTCCCGA     | 60.038 | 250 | 28367 | 28616 |
|    |       | R | TCATGAACGATTCTTGGATTTG   | 59.938 |     |       |       |
| 69 |       | F | GAAGCACGATAATTTCCCGA     | 60.038 | 247 | 28367 | 28613 |
|    |       | R | TGAACGATTCTTGGATTTGAA    | 58.201 |     |       |       |
| 70 | (A)10 | F | CGGAAGAATAGAATAAGAGTTGCC | 59.682 | 280 | 30216 | 30495 |
|    |       | R | ATGATCGGACTGGAATCAGC     | 60.042 |     |       |       |
| 71 |       | F | TGATTGGAACCAATACAAATCAAA | 60.44  | 239 | 30257 | 30495 |
|    |       | R | ATGATCGGACTGGAATCAGC     | 60.042 |     |       |       |

|    |       |   |                             |        |     |       |       |
|----|-------|---|-----------------------------|--------|-----|-------|-------|
| 72 |       | F | TTGCCTTTTGATTATTTTCAGATTG   | 59.537 | 261 | 30235 | 30495 |
|    |       | R | ATGATCGGACTGGAATCAGC        | 60.042 |     |       |       |
| 73 | (A)12 | F | TTGGAATCCTGAATATGACGC       | 59.915 | 266 | 31470 | 31735 |
|    |       | R | CGATGGATACAAATCCACGA        | 59.35  |     |       |       |
| 74 |       | F | TGGAATCCTGAATATGACGCT       | 59.542 | 265 | 31471 | 31735 |
|    |       | R | CGATGGATACAAATCCACGA        | 59.35  |     |       |       |
| 75 |       | F | TGGAATCCTGAATATGACGC        | 58.521 | 265 | 31471 | 31735 |
|    |       | R | CGATGGATACAAATCCACGA        | 59.35  |     |       |       |
| 76 | (A)13 | F | AATTGTTCAATCCAATCGCC        | 59.768 | 174 | 32637 | 32810 |
|    |       | R | TATGCCACCGAATCTTAGC         | 60.06  |     |       |       |
| 77 |       | F | GCCCGACCACCATTCTACTA        | 59.955 | 280 | 32486 | 32765 |
|    |       | R | GTTTAACCCTAACCCCCTCG        | 59.698 |     |       |       |
| 78 |       | F | GCCCGACCACCATTCTACTA        | 59.955 | 252 | 32486 | 32737 |
|    |       | R | GGCAAACCAATCATTTCTG         | 60.309 |     |       |       |
| 79 | (A)11 | F | CCAATCAAAAGCCATTGGAA        | 60.807 | 244 | 33638 | 33881 |
|    |       | R | CGTGGAGTAAGGGAATAGCAA       | 59.234 |     |       |       |
| 80 |       | F | CATCTCCGCCAGATATTCCT        | 59.105 | 277 | 33605 | 33881 |
|    |       | R | CGTGGAGTAAGGGAATAGCAA       | 59.234 |     |       |       |
| 81 |       | F | CCAATCAAAAGCCATTGGAA        | 60.807 | 245 | 33638 | 33882 |
|    |       | R | ACGTGGAGTAAGGGAATAGCAA      | 60.021 |     |       |       |
| 82 | (T)12 | F | TTGCTATTCCCTTACTCCACG       | 59.234 | 114 | 33861 | 33974 |
|    |       | R | TTGATCTTTTCTTGTGTTTCGGA     | 59.724 |     |       |       |
| 83 |       | F | TTGCTATTCCCTTACTCCACG       | 59.234 | 103 | 33861 | 33963 |
|    |       | R | TTGTGTTTCGAAAATCAAAGAAA     | 59.603 |     |       |       |
| 84 |       | F | TGCTATTCCCTTACTCCACG        | 57.85  | 113 | 33862 | 33974 |
|    |       | R | TTGATCTTTTCTTGTGTTTCGGA     | 59.724 |     |       |       |
| 85 | (A)12 | F | TCTGAAAGAAAGGAAAATAGAACAAA  | 58.983 | 268 | 34397 | 34664 |
|    |       | R | TGAATCTTGTTCGTGACATTGA      | 59.174 |     |       |       |
| 86 |       | F | TCTGAAAGAAAGGAAAATAGAACAAAA | 60.05  | 268 | 34397 | 34664 |

|     |                                           |   |                           |        |     |       |       |
|-----|-------------------------------------------|---|---------------------------|--------|-----|-------|-------|
|     |                                           | R | TGAATCTTGTTCGTGACATTGA    | 59.174 |     |       |       |
| 87  |                                           | F | TCTGAAAGAAAGGAAAATAGAACAA | 57.818 | 268 | 34397 | 34664 |
|     |                                           | R | TGAATCTTGTTCGTGACATTGA    | 59.174 |     |       |       |
| 88  | (A)10                                     | F | GCATGCCCTTTTGTGAAGTT      | 60.118 | 121 | 37948 | 38068 |
|     |                                           | R | AATGCATCATGGGGGTTTTA      | 60.016 |     |       |       |
| 89  |                                           | F | AGCATGCCCTTTTGTGAAGT      | 59.74  | 122 | 37947 | 38068 |
|     |                                           | R | AATGCATCATGGGGGTTTTA      | 60.016 |     |       |       |
| 90  |                                           | F | GCATGCCCTTTTGTGAAGTT      | 60.118 | 111 | 37948 | 38058 |
|     |                                           | R | GGGGGTTTTACCATGAATCC      | 60.245 |     |       |       |
| 91  | (A)14taataattctaattaatttctagttaaaaaaatcaa | F | TCTTTGCCAAGGAGAAGACG      | 60.508 | 250 | 38858 | 39107 |
|     | acctcaa(T)11                              | R | TTGAGGTCACGGGTTCAAAT      | 60.353 |     |       |       |
| 92  |                                           | F | TCTTTGCCAAGGAGAAGACG      | 60.508 | 273 | 38858 | 39130 |
|     |                                           | R | GGTAGCTCGCAAGGCTCATA      | 60.511 |     |       |       |
| 93  |                                           | F | TCTTTGCCAAGGAGAAGACG      | 60.508 | 249 | 38858 | 39106 |
|     |                                           | R | TGAGGTCACGGGTTCAAATC      | 60.903 |     |       |       |
| 94  | (T)12                                     | F | GAGTTTCCTGCCTCATACGG      | 59.694 | 266 | 45175 | 45440 |
|     |                                           | R | GAGTGGAAATGCCAATCCTT      | 58.984 |     |       |       |
| 95  |                                           | F | GAGTTTCCTGCCTCATACGG      | 59.694 | 267 | 45175 | 45441 |
|     |                                           | R | AGAGTGGAAATGCCAATCCTT     | 59.954 |     |       |       |
| 96  |                                           | F | GCCTCATACGGCTCAGAAGT      | 59.459 | 257 | 45184 | 45440 |
|     |                                           | R | GAGTGGAAATGCCAATCCTT      | 58.984 |     |       |       |
| 97  | (T)11                                     | F | ATCGGCTCAAAACCTCGTTA      | 59.708 | 275 | 45747 | 46021 |
|     |                                           | R | TATGGCCGTGATCTGTCATT      | 58.953 |     |       |       |
| 98  |                                           | F | TATCGGCTCAAAACCTCGTT      | 59.708 | 276 | 45746 | 46021 |
|     |                                           | R | TATGGCCGTGATCTGTCATT      | 58.953 |     |       |       |
| 99  |                                           | F | ATCGGCTCAAAACCTCGTTA      | 59.708 | 274 | 45747 | 46020 |
|     |                                           | R | ATGGCCGTGATCTGTCATTA      | 58.953 |     |       |       |
| 100 | (A)10gaatcgaccgttcgagtattcaaaattgcatgata  | F | GAAAGAGAAAGGCCCAATCC      | 60.017 | 225 | 49794 | 50018 |
|     | aaaatgatataaagaggacata(AT)8               | R | TTGGTCCAATCCGAAATGAT      | 60.133 |     |       |       |

|     |                                                                         |   |                       |        |     |       |       |
|-----|-------------------------------------------------------------------------|---|-----------------------|--------|-----|-------|-------|
| 101 |                                                                         | F | GAAAGAGAAAGGCCCAATCC  | 60.017 | 231 | 49794 | 50024 |
|     |                                                                         | R | CCATATTTGGTCCAATCCGA  | 60.523 |     |       |       |
| 102 |                                                                         | F | ATAGGGAGGGTCTGTCTGCC  | 60.477 | 279 | 49740 | 50018 |
|     |                                                                         | R | TTGGTCCAATCCGAAATGAT  | 60.133 |     |       |       |
| 103 | (A)13                                                                   | F | CAACCGTTTCGGCATAATTT  | 59.832 | 217 | 50110 | 50326 |
|     |                                                                         | R | GGAAAACAGGATTTGGCTCA  | 60.051 |     |       |       |
| 104 |                                                                         | F | CAACCGTTTCGGCATAATTT  | 59.832 | 141 | 50110 | 50250 |
|     |                                                                         | R | GGTTTCCATACCAAGGCTCA  | 59.933 |     |       |       |
| 105 |                                                                         | F | AATGAATTCAACCGTTTCGG  | 59.801 | 225 | 50102 | 50326 |
|     |                                                                         | R | GGAAAACAGGATTTGGCTCA  | 60.051 |     |       |       |
| 106 | (T)10                                                                   | F | CGGCCATAAACTGGAGAGTC  | 59.694 | 274 | 53208 | 53481 |
|     |                                                                         | R | ATCCATGGGCAATGAGTTTC  | 59.756 |     |       |       |
| 107 |                                                                         | F | CCATAGAGAAGCGGCCATAA  | 60.188 | 199 | 53197 | 53395 |
|     |                                                                         | R | GTTTATGCATGGCGAAAAGG  | 60.456 |     |       |       |
| 108 |                                                                         | F | GTACCATAGAGAAGCGGCCA  | 60.235 | 202 | 53194 | 53395 |
|     |                                                                         | R | GTTTATGCATGGCGAAAAGG  | 60.456 |     |       |       |
| 109 | (T)10caagcgcggaaacctcaggaccagaagcggtaggattattctcataataaaaatatatcaa(T)10 | F | CCTGGGGGAAAAGCTACATC  | 60.817 | 256 | 57214 | 57469 |
|     |                                                                         | R | GAATTGGATTGGTTGGATGG  | 59.991 |     |       |       |
| 110 |                                                                         | F | TATTTGAGCGATACGTCCCA  | 59.136 | 221 | 57249 | 57469 |
|     |                                                                         | R | GAATTGGATTGGTTGGATGG  | 59.991 |     |       |       |
| 111 |                                                                         | F | CGGACCAATTATTTGAGCGA  | 60.961 | 230 | 57240 | 57469 |
|     |                                                                         | R | GAATTGGATTGGTTGGATGG  | 59.991 |     |       |       |
| 112 | (A)11                                                                   | F | TCATTGGCCCTTATTTCAGC  | 60.038 | 235 | 57665 | 57899 |
|     |                                                                         | R | TTCATATGTATGGCGCAACC  | 59.405 |     |       |       |
| 113 |                                                                         | F | TTTTCGTGGGCTAATTCTGC  | 60.209 | 166 | 57734 | 57899 |
|     |                                                                         | R | TTCATATGTATGGCGCAACC  | 59.405 |     |       |       |
| 114 |                                                                         | F | TCATTGGCCCTTATTTCAGC  | 60.038 | 278 | 57665 | 57942 |
|     |                                                                         | R | CCATGGTATTTGATTTGCCA  | 59.232 |     |       |       |
| 115 | (A)10                                                                   | F | CTGCAGAAAGAATCATGTGGA | 58.862 | 278 | 61962 | 62239 |

|     |                                                   |   |                           |        |     |       |       |
|-----|---------------------------------------------------|---|---------------------------|--------|-----|-------|-------|
|     |                                                   | R | AATAGGGATTCTGGGTTCTCG     | 60.278 |     |       |       |
| 116 |                                                   | F | TGCAGAAAGAATCATGTGGA      | 57.743 | 277 | 61963 | 62239 |
|     |                                                   | R | AATAGGGATTCTGGGTTCTCG     | 60.278 |     |       |       |
| 117 |                                                   | F | ACTGCAGAAAGAATCATGTGGA    | 59.74  | 279 | 61961 | 62239 |
|     |                                                   | R | AATAGGGATTCTGGGTTCTCG     | 60.278 |     |       |       |
| 118 |                                                   | F | GCGAAATTAGGCAAGAGGAA      | 59.433 | 183 | 62057 | 62239 |
|     |                                                   | R | AATAGGGATTCTGGGTTCTCG     | 60.278 |     |       |       |
| 119 |                                                   | F | GCGAAATTAGGCAAGAGGAA      | 59.433 | 176 | 62057 | 62232 |
|     |                                                   | R | ATTCGGGTTCTCGGGAGTAG      | 60.455 |     |       |       |
| 120 |                                                   | F | AAGCGAATTCTTTCTTCCGC      | 60.821 | 201 | 62039 | 62239 |
|     |                                                   | R | AATAGGGATTCTGGGTTCTCG     | 60.278 |     |       |       |
| 121 | (T)10                                             | F | CGAGAACCCGAATCCCTATT      | 60.278 | 180 | 62220 | 62399 |
|     |                                                   | R | TGATTCTGTCTGATAATTTCCATTT | 59.349 |     |       |       |
| 122 |                                                   | F | CGAGAACCCGAATCCCTATT      | 60.278 | 182 | 62220 | 62401 |
|     |                                                   | R | TTTGATTCTGTCTGATAATTTCCAT | 59.349 |     |       |       |
| 123 |                                                   | F | CGAGAACCCGAATCCCTATT      | 60.278 | 181 | 62220 | 62400 |
|     |                                                   | R | TTGATTCTGTCTGATAATTTCCATT | 59.349 |     |       |       |
| 124 |                                                   | F | CAATTGCAATGGCTTCCTTA      | 58.769 | 261 | 62762 | 63022 |
|     |                                                   | R | ATACGTTCTGATCGCCAACC      | 59.962 |     |       |       |
| 125 |                                                   | F | CAATTGCAATGGCTTCCTTA      | 58.769 | 250 | 62762 | 63011 |
|     |                                                   | R | TCGCCAACCCATACTAGACC      | 59.955 |     |       |       |
| 126 |                                                   | F | TTGTCCCTTTAGTGGGCCT       | 59.536 | 280 | 62732 | 63011 |
|     |                                                   | R | TCGCCAACCCATACTAGACC      | 59.955 |     |       |       |
| 127 | (A)11tgaacttgaagaataaaataaatgaatgctttc<br>tt(A)10 | F | GAGAATTTGACCCCACGAGA      | 60.05  | 241 | 63474 | 63714 |
|     |                                                   | R | CACCTTCACCTCATTTCGTCA     | 59.676 |     |       |       |
| 128 |                                                   | F | GAATTTGACCCCACGAGAAA      | 59.91  | 239 | 63476 | 63714 |
|     |                                                   | R | CACCTTCACCTCATTTCGTCA     | 59.676 |     |       |       |
| 129 |                                                   | F | ATTGGCCTATTTCTTGCGTG      | 60.096 | 200 | 63515 | 63714 |
|     |                                                   | R | CACCTTCACCTCATTTCGTCA     | 59.676 |     |       |       |

|     |               |   |                          |        |     |       |       |
|-----|---------------|---|--------------------------|--------|-----|-------|-------|
| 130 | (T)10         | F | AGAGCCCCTTTTCCTTGTGT     | 60.11  | 257 | 66012 | 66268 |
|     |               | R | TTTGCTCAATAAAATTCCTCTC   | 58.809 |     |       |       |
| 131 |               | F | CCTAGAGCCCCTTTTCCTTG     | 60.193 | 260 | 66009 | 66268 |
|     |               | R | TTTGCTCAATAAAATTCCTCTC   | 58.809 |     |       |       |
| 132 |               | F | AGAGCCCCTTTTCCTTGTGT     | 60.11  | 255 | 66012 | 66266 |
|     |               | R | TGCTCAATAAAATTCCTCTCTTT  | 59.663 |     |       |       |
| 133 | (AAAT)5       | F | GAGAGGGAATTTTATTGAGCAA   | 58.809 | 229 | 66246 | 66474 |
|     |               | R | ACTTTTTCTGGGTGACGGTG     | 60.005 |     |       |       |
| 134 |               | F | AGAGAGGGAATTTTATTGAGCAA  | 59.663 | 230 | 66245 | 66474 |
|     |               | R | ACTTTTTCTGGGTGACGGTG     | 60.005 |     |       |       |
| 135 |               | F | AAAGAGAGGGAATTTTATTGAGCA | 59.663 | 232 | 66243 | 66474 |
|     |               | R | ACTTTTTCTGGGTGACGGTG     | 60.005 |     |       |       |
| 136 | (T)12         | F | GCGAGTAAAATGTGAATCCGA    | 60.089 | 269 | 67896 | 68164 |
|     |               | R | CGCATCGCGACTATTGATT      | 59.807 |     |       |       |
| 137 |               | F | GGATCGCGAGTAAAATGTGAA    | 60.089 | 274 | 67891 | 68164 |
|     |               | R | CGCATCGCGACTATTGATT      | 59.807 |     |       |       |
| 138 |               | F | TCGCGAGTAAAATGTGAATCC    | 60.089 | 271 | 67894 | 68164 |
|     |               | R | CGCATCGCGACTATTGATT      | 59.807 |     |       |       |
| 139 | (AT)6         | F | ACCTACGACATCGGGTTTTG     | 59.853 | 279 | 69425 | 69703 |
|     |               | R | CAAGGGATCAATTGAGATCG     | 58.089 |     |       |       |
| 140 |               | F | ACCTACGACATCGGGTTTTG     | 59.853 | 280 | 69425 | 69704 |
|     |               | R | ACAAGGGATCAATTGAGATCG    | 58.995 |     |       |       |
| 141 |               | F | TGTGACCCCCAAAATAAAA      | 57.847 | 258 | 69502 | 69759 |
|     |               | R | CGGGTTCAAATCCTGTCATC     | 60.317 |     |       |       |
| 142 | (T)11gtt(A)13 | F | ATTTTtagggaatgctcggg     | 60.272 | 274 | 70003 | 70276 |
|     |               | R | TCGCATTTAAAATCCTCCTTC    | 58.325 |     |       |       |
| 143 |               | F | ATTTTtagggaatgctcggg     | 60.272 | 274 | 70003 | 70276 |
|     |               | R | TCGCATTTAAAATCCTCCTTCT   | 59.251 |     |       |       |
| 144 |               | F | ATTTTtagggaatgctcggg     | 60.272 | 276 | 70003 | 70278 |

|     |                                                                          |   |                        |        |     |       |       |
|-----|--------------------------------------------------------------------------|---|------------------------|--------|-----|-------|-------|
|     |                                                                          | R | TCTCGCATTAAAATCCTCCTT  | 59.251 |     |       |       |
| 145 | (T)11                                                                    | F | GGATGCCTTGATATTCCCCT   | 60.117 | 277 | 70372 | 70648 |
|     |                                                                          | R | TAGGATATTGTTGCCCCACC   | 59.645 |     |       |       |
| 146 |                                                                          | F | GGATGCCTTGATATTCCCCT   | 60.117 | 274 | 70372 | 70645 |
|     |                                                                          | R | GATATTGTTGCCCCACCCTA   | 59.645 |     |       |       |
| 147 |                                                                          | F | GGATGCCTTGATATTCCCCT   | 60.117 | 254 | 70372 | 70625 |
|     |                                                                          | R | GCCATTACATTTCCAGGCTC   | 59.533 |     |       |       |
| 148 | (A)10                                                                    | F | AAAGCGAGTCGACCACTAGAA  | 59.135 | 224 | 71486 | 71709 |
|     |                                                                          | R | CATCAAAATGAGCAACCACG   | 60.111 |     |       |       |
| 149 |                                                                          | F | AAAAGCGAGTCGACCACTAGA  | 59.135 | 225 | 71485 | 71709 |
|     |                                                                          | R | CATCAAAATGAGCAACCACG   | 60.111 |     |       |       |
| 150 |                                                                          | F | AAAGCGAGTCGACCACTAGAAC | 59.95  | 224 | 71486 | 71709 |
|     |                                                                          | R | CATCAAAATGAGCAACCACG   | 60.111 |     |       |       |
| 151 | (T)14caaatacaatacaaatatataataaaaaagaaaa<br>tcttg(T)10                    | F | CTATGATGGTTCCGCTGCTT   | 60.235 | 239 | 73743 | 73981 |
|     |                                                                          | R | TGGGAAAAGGGCTATTTACG   | 59.075 |     |       |       |
| 152 |                                                                          | F | ACTATGATGGTTCCGCTGCT   | 59.723 | 240 | 73742 | 73981 |
|     |                                                                          | R | TGGGAAAAGGGCTATTTACG   | 59.075 |     |       |       |
| 153 |                                                                          | F | CTATGATGGTTCCGCTGCTT   | 60.235 | 240 | 73743 | 73982 |
|     |                                                                          | R | CTGGGAAAAGGGCTATTTACG  | 59.971 |     |       |       |
| 154 | (T)10                                                                    | F | CGTAAATAGCCCTTTTCCCA   | 59.075 | 200 | 73962 | 74161 |
|     |                                                                          | R | TCTAGCATTCCCTCACGCTT   | 59.978 |     |       |       |
| 155 |                                                                          | F | CGTAAATAGCCCTTTTCCCA   | 59.075 | 266 | 73962 | 74227 |
|     |                                                                          | R | AGTATGCATGGGATTAGCCG   | 59.945 |     |       |       |
| 156 |                                                                          | F | CGTAAATAGCCCTTTTCCCAG  | 59.971 | 200 | 73962 | 74161 |
|     |                                                                          | R | TCTAGCATTCCCTCACGCTT   | 59.978 |     |       |       |
| 157 | (T)10cttacattttcaaaaaagacgacttttgaccggtt<br>acttatattataagtattataag(A)11 | F | TGCATACGGTTCACCAAAAA   | 59.969 | 263 | 74482 | 74744 |
|     |                                                                          | R | ACGATTTGGATTTCGATCTGG  | 59.894 |     |       |       |
| 158 |                                                                          | F | ATAGCGGGCTTTTTCGAACT   | 60.224 | 185 | 74560 | 74744 |
|     |                                                                          | R | ACGATTTGGATTTCGATCTGG  | 59.894 |     |       |       |

|     |             |   |                       |        |     |       |       |
|-----|-------------|---|-----------------------|--------|-----|-------|-------|
| 159 |             | F | GATGCATACGGTTCACCAAA  | 59.4   | 265 | 74480 | 74744 |
|     |             | R | ACGATTTGGATTTCGATCTGG | 59.894 |     |       |       |
| 160 | (A)10       | F | ACTTTGATGCGGAAGCGTAA  | 60.772 | 264 | 75338 | 75601 |
|     |             | R | ATACGCAATGGTGTAGGGGA  | 60.214 |     |       |       |
| 161 |             | F | CTTTGATGCGGAAGCGTAA   | 60.772 | 263 | 75339 | 75601 |
|     |             | R | ATACGCAATGGTGTAGGGGA  | 60.214 |     |       |       |
| 162 |             | F | ACTTTGATGCGGAAGCGTAA  | 60.772 | 265 | 75338 | 75602 |
|     |             | R | AATACGCAATGGTGTAGGGG  | 59.708 |     |       |       |
| 163 | (A)11t(A)11 | F | ATATTTAGACCTCGCAGCCG  | 59.343 | 251 | 78432 | 78682 |
|     |             | R | AGATTCATACCGGAACCACG  | 59.813 |     |       |       |
| 164 |             | F | ATATTTAGACCTCGCAGCCG  | 59.343 | 246 | 78432 | 78677 |
|     |             | R | CATACCGGAACCACGATGAT  | 60.603 |     |       |       |
| 165 |             | F | ATATTTAGACCTCGCAGCCG  | 59.343 | 250 | 78432 | 78681 |
|     |             | R | GATTCATACCGGAACCACGA  | 60.723 |     |       |       |
| 166 | (T)10       | F | TTCGAGTATTGGGATTTGTGC | 59.952 | 271 | 81307 | 81577 |
|     |             | R | CCAATTAGAATTGCCTCCCC  | 60.633 |     |       |       |
| 167 |             | F | TCGAGTATTGGGATTTGTGCT | 59.583 | 270 | 81308 | 81577 |
|     |             | R | CCAATTAGAATTGCCTCCCC  | 60.633 |     |       |       |
| 168 |             | F | TCGAGTATTGGGATTTGTGC  | 58.574 | 270 | 81308 | 81577 |
|     |             | R | CCAATTAGAATTGCCTCCCC  | 60.633 |     |       |       |
| 169 | (A)13       | F | GAACGGAGGCCCTTATTTTC  | 59.909 | 206 | 83360 | 83565 |
|     |             | R | TTTTGATTCAACCAGAGGGC  | 60.051 |     |       |       |
| 170 |             | F | CTACGGATCAGCCGACATTT  | 60.096 | 240 | 83326 | 83565 |
|     |             | R | TTTTGATTCAACCAGAGGGC  | 60.051 |     |       |       |
| 171 |             | F | ACTATAATTCGTCCCCGCCT  | 59.82  | 258 | 83308 | 83565 |
|     |             | R | TTTTGATTCAACCAGAGGGC  | 60.051 |     |       |       |
| 172 | (T)10       | F | GATTGTTGCCCGTGACTTTT  | 59.978 | 269 | 84299 | 84567 |
|     |             | R | GCCCGAGAATTGAGACAGTT  | 59.288 |     |       |       |
| 173 |             | F | GATTGTTGCCCGTGACTTTT  | 59.978 | 234 | 84299 | 84532 |



|     |                                              |   |                         |        |     |        |        |
|-----|----------------------------------------------|---|-------------------------|--------|-----|--------|--------|
|     |                                              | R | AGTTTCATTAGCACCCGAGG    | 59.195 |     |        |        |
| 174 |                                              | F | ATGATTGTTGCCCGTGACTT    | 60.384 | 271 | 84297  | 84567  |
|     |                                              | R | GCCCGAGAATTGAGACAGTT    | 59.288 |     |        |        |
| 175 | (T)10atctgttctttcagtgcaaagcaaaggacgaagt(A)10 | F | CCGCTGTTATCGGCTACATT    | 60.117 | 240 | 84830  | 85069  |
|     |                                              | R | ATAGCAGCATCCAAAATGCC    | 60.067 |     |        |        |
| 176 |                                              | F | CCGCTGTTATCGGCTACATT    | 60.117 | 237 | 84830  | 85066  |
|     |                                              | R | GCAGCATCCAAAATGCCTAT    | 60.067 |     |        |        |
| 177 |                                              | F | CGGCTACATTCAAATGGGTT    | 59.823 | 230 | 84840  | 85069  |
|     |                                              | R | ATAGCAGCATCCAAAATGCC    | 60.067 |     |        |        |
| 178 | (T)11                                        | F | TTATTGACTCGGGGCTCTTG    | 60.206 | 176 | 86061  | 86236  |
|     |                                              | R | TGAAAGGGTGAAAGAAAGAGAGA | 59.508 |     |        |        |
| 179 |                                              | F | TTCCCATCGCTTCTCGATTA    | 60.681 | 270 | 85967  | 86236  |
|     |                                              | R | TGAAAGGGTGAAAGAAAGAGAGA | 59.508 |     |        |        |
| 180 |                                              | F | TATTGACTCGGGGCTCTTGA    | 60.734 | 175 | 86062  | 86236  |
|     |                                              | R | TGAAAGGGTGAAAGAAAGAGAGA | 59.508 |     |        |        |
| 181 |                                              | F | TCTCTTTTCTTTCACCCTTTCA  | 59.508 | 185 | 86214  | 86398  |
|     |                                              | R | CAACTCATCGCTTCGCATTA    | 59.976 |     |        |        |
| 182 |                                              | F | TCTCTTTTCTTTCACCCTTTCA  | 59.508 | 181 | 86214  | 86394  |
|     |                                              | R | TCATCGCTTCGCATTATCTG    | 59.937 |     |        |        |
| 183 |                                              | F | TCTCTTTTCTTTCACCCTTTCA  | 59.508 | 179 | 86214  | 86392  |
|     |                                              | R | ATCGCTTCGCATTATCTGGA    | 60.711 |     |        |        |
| 184 | (T)13                                        | F | TTTTGTCCATAATTCCCCA     | 59.988 | 261 | 87309  | 87569  |
|     |                                              | R | TGAGTCAAAGCTGAAGGTCC    | 59.463 |     |        |        |
| 185 |                                              | F | TTTGTCCATAATTCCCCAC     | 59.481 | 260 | 87310  | 87569  |
|     |                                              | R | TGAGTCAAAGCTGAAGGTCC    | 59.463 |     |        |        |
| 186 |                                              | F | TTTTGTCCATAATTCCCCA     | 59.988 | 267 | 87309  | 87575  |
|     |                                              | R | GCAAGTTGAGTCAAAGCTGAA   | 59.677 |     |        |        |
| 187 | (T)10                                        | F | TTTTCACCTCATACGGCTCC    | 60.074 | 194 | 102761 | 102954 |
|     |                                              | R | CGCTCAATGAGAAAATGGGT    | 60.074 |     |        |        |

|     |       |   |                        |        |     |        |        |
|-----|-------|---|------------------------|--------|-----|--------|--------|
| 188 |       | F | CATACGGCTCCTCGTTCAAT   | 60.096 | 185 | 102770 | 102954 |
|     |       | R | CGCTCAATGAGAAAATGGGT   | 60.074 |     |        |        |
| 189 |       | F | TTGGGGGTGATAGTGGA AAA  | 60.162 | 264 | 102691 | 102954 |
|     |       | R | CGCTCAATGAGAAAATGGGT   | 60.074 |     |        |        |
| 190 | (T)11 | F | TCCGATTCATGAGGATACGA   | 59.027 | 205 | 114447 | 114651 |
|     |       | R | GGGGTAAAGAAGGGCAAAAA   | 60.285 |     |        |        |
| 191 |       | F | GTCCGATTCATGAGGATACGA  | 59.909 | 206 | 114446 | 114651 |
|     |       | R | GGGGTAAAGAAGGGCAAAAA   | 60.285 |     |        |        |
| 192 |       | F | CCGATTCATGAGGATACGAAA  | 59.908 | 204 | 114448 | 114651 |
|     |       | R | GGGGTAAAGAAGGGCAAAAA   | 60.285 |     |        |        |
| 193 | (T)10 | F | GGAAGTATTGGGCAAAGCAA   | 59.903 | 231 | 116031 | 116261 |
|     |       | R | TGAAGTATTGGGCAAAGCAA   | 59.301 |     |        |        |
| 194 |       | F | GGAAGTATTGGGCAAAGCAA   | 59.903 | 232 | 116031 | 116262 |
|     |       | R | TTGAAGTATTGGGCAAAGCAA  | 59.301 |     |        |        |
| 195 |       | F | GTTGCCGTCGGA AAAAGTAG  | 59.747 | 274 | 115989 | 116262 |
|     |       | R | TTGAAGTATTGGGCAAAGCAA  | 59.301 |     |        |        |
| 196 | (A)11 | F | GGCAGTACGCCGAAAATAGA   | 60.23  | 273 | 116865 | 117137 |
|     |       | R | TTGGAAGTACCATTCAAAAA   | 59.133 |     |        |        |
| 197 |       | F | AAGGCAGTACGCCGAAAATA   | 59.742 | 275 | 116863 | 117137 |
|     |       | R | TTGGAAGTACCATTCAAAAA   | 59.133 |     |        |        |
| 198 |       | F | ATAAAGGCAGTACGCCGAAA   | 59.742 | 278 | 116860 | 117137 |
|     |       | R | TTGGAAGTACCATTCAAAAA   | 59.133 |     |        |        |
| 199 |       | F | GCGAAATCTCTTTATACGGGG  | 59.943 | 262 | 117227 | 117488 |
|     |       | R | CAGAAGAACGAAATGGGTTCA  | 60.096 |     |        |        |
| 200 |       | F | TGAATTAGACGAATGCGAAGAA | 59.853 | 194 | 117295 | 117488 |
|     |       | R | CAGAAGAACGAAATGGGTTCA  | 60.096 |     |        |        |
| 201 |       | F | GCGAAATCTCTTTATACGGGG  | 59.943 | 261 | 117227 | 117487 |
|     |       | R | AGAAGAACGAAATGGGTTCAA  | 58.682 |     |        |        |
| 202 |       | F | CGGGATGGGGATTCTTATTT   | 59.978 | 205 | 117589 | 117793 |

|     |                                                             |   |                       |        |     |        |        |
|-----|-------------------------------------------------------------|---|-----------------------|--------|-----|--------|--------|
|     |                                                             | R | ACCATAGCGGCTTGCTCTAA  | 60.003 |     |        |        |
| 203 |                                                             | F | GGGGATTCTTATTTTCCCA   | 59.957 | 199 | 117595 | 117793 |
|     |                                                             | R | ACCATAGCGGCTTGCTCTAA  | 60.003 |     |        |        |
| 204 |                                                             | F | CGGGATGGGGATTCTTATTT  | 59.978 | 228 | 117589 | 117816 |
|     |                                                             | R | AGAGCAGCGTGTCTACCGAT  | 60.043 |     |        |        |
| 205 | (T)10                                                       | F | TCAATTCCCGATTTCCATTC  | 59.699 | 208 | 117898 | 118105 |
|     |                                                             | R | TCCTTTTTTCGGACGAATCAT | 59.505 |     |        |        |
| 206 |                                                             | F | AATTCCCGATTTCCATTCCT  | 59.605 | 206 | 117900 | 118105 |
|     |                                                             | R | TCCTTTTTTCGGACGAATCAT | 59.505 |     |        |        |
| 207 |                                                             | F | AGAGCATCTCGGTTTCGAGTC | 59.56  | 275 | 117831 | 118105 |
|     |                                                             | R | TCCTTTTTTCGGACGAATCAT | 59.505 |     |        |        |
| 208 | (A)13                                                       | F | TGGGATCCAAAGGAACTTG   | 59.903 | 223 | 118733 | 118955 |
|     |                                                             | R | CAAGCCCCTTACTCACTCCA  | 60.246 |     |        |        |
| 209 |                                                             | F | TGAGGCATGGGGATCATATT  | 60.118 | 248 | 118708 | 118955 |
|     |                                                             | R | CAAGCCCCTTACTCACTCCA  | 60.246 |     |        |        |
| 210 |                                                             | F | GAGGCATGGGGATCATATTG  | 60.118 | 247 | 118709 | 118955 |
|     |                                                             | R | CAAGCCCCTTACTCACTCCA  | 60.246 |     |        |        |
| 211 | (T)10                                                       | F | TCTCGAAACACCAACCATA   | 60.111 | 209 | 119054 | 119262 |
|     |                                                             | R | TCAGTTGACAAGGTCGAAGC  | 59.01  |     |        |        |
| 212 |                                                             | F | AAAAGTGCATATAACCGTC   | 60.138 | 269 | 118994 | 119262 |
|     |                                                             | R | TCAGTTGACAAGGTCGAAGC  | 59.01  |     |        |        |
| 213 |                                                             | F | GAAAAGTGCATATAACCGT   | 60.138 | 270 | 118993 | 119262 |
|     |                                                             | R | TCAGTTGACAAGGTCGAAGC  | 59.01  |     |        |        |
| 214 | (T)10gtctatttgagcacgcgtttttgtcagtaaaaaaa<br>acgtattcgt(G)10 | F | CAGAAAAACGCGTGTTCAAA  | 59.888 | 269 | 120742 | 121010 |
|     |                                                             | R | GATACCTTGGGACGGCTGTA  | 59.955 |     |        |        |
| 215 |                                                             | F | CAGAAAAACGCGTGTTCAAA  | 59.888 | 178 | 120742 | 120919 |
|     |                                                             | R | CCGACGGATTTCTTGAGTGT  | 60.111 |     |        |        |
| 216 |                                                             | F | CAGAAAAACGCGTGTTCAAA  | 59.888 | 237 | 120742 | 120978 |
|     |                                                             | R | TTGCTTCTGCTCCAAGAACA  | 59.716 |     |        |        |

|     |                                                              |   |                            |        |     |        |        |
|-----|--------------------------------------------------------------|---|----------------------------|--------|-----|--------|--------|
| 217 | (A)11                                                        | F | CGAGCATCATTGATCAACTCC      | 60.619 | 243 | 121662 | 121904 |
|     |                                                              | R | GCAACAGCAATAGCAATCCA       | 59.839 |     |        |        |
| 218 |                                                              | F | CGAGCATCATTGATCAACTCC      | 60.619 | 273 | 121662 | 121934 |
|     |                                                              | R | TGGCTCGCCAGTAAGAAATC       | 60.352 |     |        |        |
| 219 |                                                              | F | CGAGCATCATTGATCAACTCC      | 60.619 | 274 | 121662 | 121935 |
|     |                                                              | R | GTGGCTCGCCAGTAAGAAAT       | 59.34  |     |        |        |
| 220 | (A)10                                                        | F | CCAACGAAAAGGCAGAAAAA       | 60.215 | 179 | 122334 | 122512 |
|     |                                                              | R | TCCTGGTCCTATCAATAAGGTCAT   | 60.095 |     |        |        |
| 221 |                                                              | F | TAGTCCCAACGAAAAGGCAG       | 60.241 | 184 | 122329 | 122512 |
|     |                                                              | R | TCCTGGTCCTATCAATAAGGTCAT   | 60.095 |     |        |        |
| 222 |                                                              | F | CTAGTCCCAACGAAAAGGCA       | 60.241 | 185 | 122328 | 122512 |
|     |                                                              | R | TCCTGGTCCTATCAATAAGGTCAT   | 60.095 |     |        |        |
| 223 | (TAA)5                                                       | F | GCTCCTCGAGGCCATAAATA       | 59.277 | 209 | 124144 | 124352 |
|     |                                                              | R | AAGGGATGAGAGCAATTCAGA      | 58.875 |     |        |        |
| 224 |                                                              | F | GCTCCTCGAGGCCATAAATA       | 59.277 | 207 | 124144 | 124350 |
|     |                                                              | R | GGGATGAGAGCAATTCAGAAG      | 58.875 |     |        |        |
| 225 |                                                              | F | GCTCCTCGAGGCCATAAATA       | 59.277 | 208 | 124144 | 124351 |
|     |                                                              | R | AGGGATGAGAGCAATTCAGAAG     | 59.848 |     |        |        |
| 226 | (T)11cgttcctattcttcttttggttttatgtgcataaagg<br>gcac(T)10(A)14 | F | ACGGGATCCCTCTTTCTTTG       | 60.434 | 207 | 124509 | 124715 |
|     |                                                              | R | CAGGCAGTACTCCCCACAAT       | 59.989 |     |        |        |
| 227 |                                                              | F | CGGGATCCCTCTTTCTTTGT       | 60.434 | 206 | 124510 | 124715 |
|     |                                                              | R | CAGGCAGTACTCCCCACAAT       | 59.989 |     |        |        |
| 228 |                                                              | F | GACGGGATCCCTCTTTCTTT       | 59.513 | 208 | 124508 | 124715 |
|     |                                                              | R | CAGGCAGTACTCCCCACAAT       | 59.989 |     |        |        |
| 229 | (T)11                                                        | F | TGATACTCATTCAATTTGAATTTGG  | 59.306 | 262 | 127579 | 127840 |
|     |                                                              | R | TGCACACACGCATTGTCTTA       | 59.902 |     |        |        |
| 230 |                                                              | F | TGATACTCATTCAATTTGAATTTGG  | 59.306 | 263 | 127579 | 127841 |
|     |                                                              | R | ATGCACACACGCATTGTCTT       | 60.192 |     |        |        |
| 231 |                                                              | F | TGATACTCATTCAATTTGAATTTGGT | 60.016 | 262 | 127579 | 127840 |

|     |       |   |                            |        |     |        |        |
|-----|-------|---|----------------------------|--------|-----|--------|--------|
|     |       | R | TGCACACACGCATTGTCTTA       | 59.902 |     |        |        |
| 232 | (T)13 | F | GGTATCGACCCAGTCCTCAA       | 59.927 | 146 | 129101 | 129246 |
|     |       | R | TGACGGATGATATCTCTATCAAGAA  | 59.157 |     |        |        |
| 233 |       | F | GGTATCGACCCAGTCCTCAA       | 59.927 | 162 | 129101 | 129262 |
|     |       | R | CAAAAAC TATTTGATATGACGGATG | 58.909 |     |        |        |
| 234 |       | F | GGTATCGACCCAGTCCTCAA       | 59.927 | 163 | 129101 | 129263 |
|     |       | R | ACAAAAC TATTTGATATGACGGATG | 59.617 |     |        |        |
| 235 | (T)10 | F | TGAATTCTTTCTTCATTTGCTTCA   | 60.232 | 169 | 129912 | 130080 |
|     |       | R | TCCGAAATCGCATTATTTT        | 59.393 |     |        |        |
| 236 |       | F | TGAATTCTTTCTTCATTTGCTTCA   | 60.232 | 175 | 129912 | 130086 |
|     |       | R | GATTAGTCCGAAATCGCAT        | 59.001 |     |        |        |
| 237 |       | F | TGAATTCTTTCTTCATTTGCTTCA   | 60.232 | 168 | 129912 | 130079 |
|     |       | R | CCGAAATCGCATTATTTT         | 58.937 |     |        |        |
| 238 | (T)11 | F | TGATGATCCATGCTGCTGTT       | 60.233 | 270 | 130459 | 130728 |
|     |       | R | CGGAAAAGGATCCAATGAAA       | 59.872 |     |        |        |
| 239 |       | F | TTGATGATCCATGCTGCTGT       | 60.233 | 271 | 130458 | 130728 |
|     |       | R | CGGAAAAGGATCCAATGAAA       | 59.872 |     |        |        |
| 240 |       | F | TTGATGATCCATGCTGCTGT       | 60.233 | 221 | 130458 | 130678 |
|     |       | R | TTAACAATTTGGGGAACGGA       | 60.16  |     |        |        |
| 241 | (T)10 | F | TTCCGTTCCCAAATTGTTA        | 60.16  | 112 | 130658 | 130769 |
|     |       | R | TTTTCGTCTGAAACCTTGGC       | 60.227 |     |        |        |
| 242 |       | F | CCGTTCCCAAATTGTTAAA        | 59.671 | 110 | 130660 | 130769 |
|     |       | R | TTTTCGTCTGAAACCTTGGC       | 60.227 |     |        |        |
| 243 |       | F | TTCCGTTCCCAAATTGTTA        | 60.16  | 258 | 130658 | 130915 |
|     |       | R | TTTCAAGTTCCCGAATGGTT       | 59.406 |     |        |        |
| 244 | (T)11 | F | GTCCGTTCAAGAAAGGATCG       | 59.67  | 254 | 131977 | 132230 |
|     |       | R | TTTTGTGGAATGATGCAAAA       | 59.039 |     |        |        |
| 245 |       | F | GTCCGTTCAAGAAAGGATCG       | 59.67  | 259 | 131977 | 132235 |
|     |       | R | TCAACTTTTGTGGAATGATGC      | 59.982 |     |        |        |

|     |       |   |                        |        |     |        |        |
|-----|-------|---|------------------------|--------|-----|--------|--------|
| 246 |       | F | GTCCGTTCAAGAAAGGATCG   | 59.67  | 255 | 131977 | 132231 |
|     |       | R | CTTTTGTGGAAATGATGCAAAA | 59.979 |     |        |        |
| 247 | (A)10 | F | CGCTCAATGAGAAAATGGGT   | 60.074 | 194 | 143541 | 143734 |
|     |       | R | TTTTCACCTCATACTGGCTCC  | 60.074 |     |        |        |
| 248 |       | F | CGCTCAATGAGAAAATGGGT   | 60.074 | 185 | 143541 | 143725 |
|     |       | R | CATACGGCTCCTCGTTCAAT   | 60.096 |     |        |        |
| 249 |       | F | CGCTCAATGAGAAAATGGGT   | 60.074 | 264 | 143541 | 143804 |
|     |       | R | TTGGGGGTGATAGTGAAAA    | 60.162 |     |        |        |

**Table S4.** Species included in phylogenetic analysis. (\* = outgroup; # = species in compared analysis.)

| Code | Accession | Organism                                                                          | Taxonomy                                             |
|------|-----------|-----------------------------------------------------------------------------------|------------------------------------------------------|
| 1 #  | KJ468095  | <i>Libidibia coriaria</i> (Jacq.) Schltdl.                                        | Fabaceae; Caesalpinioideae; Caesalpinia clade        |
| 2 #  | KU569489  | <i>Mezoneuron cucullatum</i> (Roxb.) Wight & Arn.                                 | Fabaceae; Caesalpinioideae; Caesalpinia clade        |
| 3 #  | KJ468097  | <i>Haematoxylum brasiletto</i> H.Karst.                                           | Fabaceae; Caesalpinioideae; Cassia clade             |
| 4    | NC_030193 | <i>Senna tora</i> (L.) Roxb.                                                      | Fabaceae; Caesalpinioideae; Cassia clade             |
| 5    | NC_034985 | <i>Acacia dealbata</i> Link                                                       | Fabaceae; Caesalpinioideae; mimosoid clade; Acacieae |
| 6    | NC_026134 | <i>Acacia ligulata</i> Benth.                                                     | Fabaceae; Caesalpinioideae; mimosoid clade; Acacieae |
| 7    | LN885332  | <i>Acacia yorkkrakinensis</i> C.A.Gardner subsp. <i>acrita</i> R.S.Cowan & Maslin | Fabaceae; Caesalpinioideae; mimosoid clade; Acacieae |
| 8    | LN885330  | <i>Acacia xanthina</i> Benth.                                                     | Fabaceae; Caesalpinioideae; mimosoid clade; Acacieae |
| 9    | LN885328  | <i>Acacia woodmaniorum</i> Maslin & Buscumb                                       | Fabaceae; Caesalpinioideae; mimosoid clade; Acacieae |
| 10   | LN885327  | <i>Acacia websteri</i> Maiden & Blakeley                                          | Fabaceae; Caesalpinioideae; mimosoid clade; Acacieae |
| 11   | LN885326  | <i>Acacia uncinella</i> Benth.                                                    | Fabaceae; Caesalpinioideae; mimosoid clade; Acacieae |
| 12   | LN885325  | <i>Acacia umbraculiformis</i> Maslin & Buscumb                                    | Fabaceae; Caesalpinioideae; mimosoid clade; Acacieae |
| 13   | LN885324  | <i>Acacia tysonii</i> Luehm.                                                      | Fabaceae; Caesalpinioideae; mimosoid clade; Acacieae |
| 14   | LN885323  | <i>Acacia tetragonophylla</i> F.Muell.                                            | Fabaceae; Caesalpinioideae; mimosoid clade; Acacieae |
| 15   | LN885319  | <i>Acacia sulcatacaulis</i> Maslin & Buscumb                                      | Fabaceae; Caesalpinioideae; mimosoid clade; Acacieae |
| 16   | LN885318  | <i>Acacia stereophylla</i> Meissner var. <i>stereophylla</i>                      | Fabaceae; Caesalpinioideae; mimosoid clade; Acacieae |
| 17   | LN885317  | <i>Acacia stanleyi</i> Maslin                                                     | Fabaceae; Caesalpinioideae; mimosoid clade; Acacieae |
| 18   | LN885316  | <i>Acacia sibina</i> Maslin                                                       | Fabaceae; Caesalpinioideae; mimosoid clade; Acacieae |

|    |          |                                                                             |                                                      |
|----|----------|-----------------------------------------------------------------------------|------------------------------------------------------|
| 19 | LN885315 | <i>Acacia sclerosperma</i> F.Muell. subsp. <i>sclerosperma</i>              | Fabaceae; Caesalpinioideae; mimosoid clade; Acacieae |
| 20 | LN885313 | <i>Acacia scleroclada</i> Maslin                                            | Fabaceae; Caesalpinioideae; mimosoid clade; Acacieae |
| 21 | LN885312 | <i>Acacia scirpifolia</i> Meissner                                          | Fabaceae; Caesalpinioideae; mimosoid clade; Acacieae |
| 22 | LN885311 | <i>Acacia scalena</i> Maslin                                                | Fabaceae; Caesalpinioideae; mimosoid clade; Acacieae |
| 23 | LN885310 | <i>Acacia rostelifera</i> Benth.                                            | Fabaceae; Caesalpinioideae; mimosoid clade; Acacieae |
| 24 | LN885308 | <i>Acacia restiacea</i> Benth.                                              | Fabaceae; Caesalpinioideae; mimosoid clade; Acacieae |
| 25 | LN885306 | <i>Acacia resinosa</i> R.S.Cowan & Maslin                                   | Fabaceae; Caesalpinioideae; mimosoid clade; Acacieae |
| 26 | LN885304 | <i>Acacia resinimarginea</i> W.Fitzg.                                       | Fabaceae; Caesalpinioideae; mimosoid clade; Acacieae |
| 27 | LN885301 | <i>Acacia ramulosa</i> W.Fitzg. var. <i>ramulosa</i>                        | Fabaceae; Caesalpinioideae; mimosoid clade; Acacieae |
| 28 | LN885300 | <i>Acacia puncticulata</i> Maslin                                           | Fabaceae; Caesalpinioideae; mimosoid clade; Acacieae |
| 29 | LN885299 | <i>Acacia prainii</i> Maiden                                                | Fabaceae; Caesalpinioideae; mimosoid clade; Acacieae |
| 30 | LN885298 | <i>Acacia oldfieldii</i> F.Muell.                                           | Fabaceae; Caesalpinioideae; mimosoid clade; Acacieae |
| 31 | LN885296 | <i>Acacia obtecta</i> Maiden & Blakeley                                     | Fabaceae; Caesalpinioideae; mimosoid clade; Acacieae |
| 32 | LN885295 | <i>Acacia neurophylla</i> W.Fitzg. subsp. <i>erugata</i> R.S.Cowan & Maslin | Fabaceae; Caesalpinioideae; mimosoid clade; Acacieae |
| 33 | LN885293 | <i>Acacia murrayana</i> Benth.                                              | Fabaceae; Caesalpinioideae; mimosoid clade; Acacieae |
| 34 | LN885291 | <i>Acacia merrallii</i> F.Muell.                                            | Fabaceae; Caesalpinioideae; mimosoid clade; Acacieae |
| 35 | LN885289 | <i>Acacia longispinea</i> Morrison                                          | Fabaceae; Caesalpinioideae; mimosoid clade; Acacieae |
| 36 | LN885287 | <i>Acacia longiphyllodinea</i> Maiden                                       | Fabaceae; Caesalpinioideae; mimosoid clade; Acacieae |
| 37 | LN885285 | <i>Acacia lineolata</i> Benth. subsp. <i>lineolata</i>                      | Fabaceae; Caesalpinioideae; mimosoid clade; Acacieae |
| 38 | LN885284 | <i>Acacia lasiocalyx</i> C.R.P.Andrews                                      | Fabaceae; Caesalpinioideae; mimosoid clade; Acacieae |
| 39 | LN885282 | <i>Acacia kochii</i> Ewart & Jean White                                     | Fabaceae; Caesalpinioideae; mimosoid clade; Acacieae |
| 40 | LN885281 | <i>Acacia karina</i> Maslin & Buscumb                                       | Fabaceae; Caesalpinioideae; mimosoid clade; Acacieae |
| 41 | LN885279 | <i>Acacia jibberdingensis</i> Maiden & Blakeley                             | Fabaceae; Caesalpinioideae; mimosoid clade; Acacieae |
| 42 | LN885277 | <i>Acacia jennerae</i> Maiden                                               | Fabaceae; Caesalpinioideae; mimosoid clade; Acacieae |
| 43 | LN885276 | <i>Acacia inceana</i> Domin subsp. <i>conformis</i> R.S.Cowan & Maslin      | Fabaceae; Caesalpinioideae; mimosoid clade; Acacieae |
| 44 | LN885274 | <i>Acacia heteroclita</i> Meissner subsp. <i>heteroclita</i>                | Fabaceae; Caesalpinioideae; mimosoid clade; Acacieae |
| 45 | LN885273 | <i>Acacia hemiteles</i> Benth.                                              | Fabaceae; Caesalpinioideae; mimosoid clade; Acacieae |
| 46 | LN885271 | <i>Acacia gibbosa</i> R.S.Cowan & Maslin                                    | Fabaceae; Caesalpinioideae; mimosoid clade; Acacieae |
| 47 | LN885270 | <i>Acacia fragilis</i> Maiden & Blakeley                                    | Fabaceae; Caesalpinioideae; mimosoid clade; Acacieae |

|    |           |                                                                                                       |                                                      |
|----|-----------|-------------------------------------------------------------------------------------------------------|------------------------------------------------------|
| 48 | LN885269  | <i>Acacia formidabilis</i> R.S.Cowan & Maslin                                                         | Fabaceae; Caesalpinioideae; mimosoid clade; Acacieae |
| 49 | LN885268  | <i>Acacia exocaroides</i> W.Fitzg.                                                                    | Fabaceae; Caesalpinioideae; mimosoid clade; Acacieae |
| 50 | LN885266  | <i>Acacia erinacea</i> Benth.                                                                         | Fabaceae; Caesalpinioideae; mimosoid clade; Acacieae |
| 51 | LN885264  | <i>Acacia eremaea</i> C.R.P.Andrews                                                                   | Fabaceae; Caesalpinioideae; mimosoid clade; Acacieae |
| 52 | LN885263  | <i>Acacia effusifolia</i> (R.S. Cowan & Maslin) Maslin & Buscumb                                      | Fabaceae; Caesalpinioideae; mimosoid clade; Acacieae |
| 53 | LN885261  | <i>Acacia duriuscula</i> W.Fitzg.                                                                     | Fabaceae; Caesalpinioideae; mimosoid clade; Acacieae |
| 54 | LN885260  | <i>Acacia diallaga</i> Maslin & Buscumb                                                               | Fabaceae; Caesalpinioideae; mimosoid clade; Acacieae |
| 55 | LN885259  | <i>Acacia daphnifolia</i> Meissner                                                                    | Fabaceae; Caesalpinioideae; mimosoid clade; Acacieae |
| 56 | LN885258  | <i>Acacia cyclops</i> G.Don                                                                           | Fabaceae; Caesalpinioideae; mimosoid clade; Acacieae |
| 57 | LN885257  | <i>Acacia coolgardiensis</i> Maiden                                                                   | Fabaceae; Caesalpinioideae; mimosoid clade; Acacieae |
| 58 | LN885256  | <i>Acacia colletioides</i> Benth.                                                                     | Fabaceae; Caesalpinioideae; mimosoid clade; Acacieae |
| 59 | LN885255  | <i>Acacia cerastes</i> Maslin                                                                         | Fabaceae; Caesalpinioideae; mimosoid clade; Acacieae |
| 60 | LN885254  | <i>Acacia burkittii</i> Benth.                                                                        | Fabaceae; Caesalpinioideae; mimosoid clade; Acacieae |
| 61 | LN885252  | <i>Acacia blakelyi</i> Maiden                                                                         | Fabaceae; Caesalpinioideae; mimosoid clade; Acacieae |
| 62 | LN885251  | <i>Acacia aulacophylla</i> R.S.Cowan & Maslin                                                         | Fabaceae; Caesalpinioideae; mimosoid clade; Acacieae |
| 63 | LN885250  | <i>Acacia assimilis</i> S.Moore subsp. <i>assimilis</i>                                               | Fabaceae; Caesalpinioideae; mimosoid clade; Acacieae |
| 64 | LN885248  | <i>Acacia ashbyae</i> Maslin                                                                          | Fabaceae; Caesalpinioideae; mimosoid clade; Acacieae |
| 65 | LN885247  | <i>Acacia anthochaera</i> Maslin                                                                      | Fabaceae; Caesalpinioideae; mimosoid clade; Acacieae |
| 66 | LN885245  | <i>Acacia andrewsii</i> W.Fitzg.                                                                      | Fabaceae; Caesalpinioideae; mimosoid clade; Acacieae |
| 67 | LN885244  | <i>Acacia ampliata</i> R.S.Cowan & Maslin                                                             | Fabaceae; Caesalpinioideae; mimosoid clade; Acacieae |
| 68 | LN885243  | <i>Acacia acuminata</i> Benth.                                                                        | Fabaceae; Caesalpinioideae; mimosoid clade; Acacieae |
| 69 | LN885241  | <i>Acacia acuaria</i> W.Fitzg.                                                                        | Fabaceae; Caesalpinioideae; mimosoid clade; Acacieae |
| 70 | LN885240  | <i>Acacia acanthoclada</i> F.Muell. subsp. <i>glaucescens</i> Maslin                                  | Fabaceae; Caesalpinioideae; mimosoid clade; Acacieae |
| 71 | NC_036736 | <i>Senegalia laeta</i> (R.Br. ex Benth.) Seigler & Ebinger                                            | Fabaceae; Caesalpinioideae; mimosoid clade; Acacieae |
| 72 | NC_036735 | <i>Vachellia seyal</i> (Delile) P.J.H.Hurter                                                          | Fabaceae; Caesalpinioideae; mimosoid clade; Acacieae |
| 73 | NC_036734 | <i>Vachellia flava</i> (Forssk.) Kyal. & Boatwr.                                                      | Fabaceae; Caesalpinioideae; mimosoid clade; Acacieae |
| 74 | KY100266  | <i>Vachellia tortilis</i> (Forssk.) Galasso & Banfi subsp. <i>raddiana</i> (Savi) Kyal. & Boatwr.     | Fabaceae; Caesalpinioideae; mimosoid clade; Acacieae |
| 75 | KY100264  | <i>Vachellia nilotica</i> (L.) P.J.H.Hurter & Mabb. subsp. <i>tomentosa</i> (Benth.) Kyal. & Boatwr.) | Fabaceae; Caesalpinioideae; mimosoid clade; Acacieae |
| 76 | NC_034987 | <i>Albizia odoratissima</i> (L.f.) Benth.                                                             | Fabaceae; Caesalpinioideae; mimosoid clade; Ingeae   |



|       |           |                                                                              |                                                      |
|-------|-----------|------------------------------------------------------------------------------|------------------------------------------------------|
| 77    | NC_034988 | <i>Archidendron lucyi</i> F.Muell.                                           | Fabaceae; Caesalpinioideae; mimosoid clade; Ingeae   |
| 78    | NC_035347 | <i>Faidherbia albida</i> (Delile) A.Chev.                                    | Fabaceae; Caesalpinioideae; mimosoid clade; Ingeae   |
| 79    | NC_028732 | <i>Inga leiocalycina</i> Benth.                                              | Fabaceae; Caesalpinioideae; mimosoid clade; Ingeae   |
| 80    | NC_035348 | <i>Pararchidendron pruinosum</i> (Benth.) I.C.Nielsen                        | Fabaceae; Caesalpinioideae; mimosoid clade; Ingeae   |
| 81    | LN885334  | <i>Paraserianthes lophantha</i> (Willd.) I.C.Nielsen subsp. <i>lophantha</i> | Fabaceae; Caesalpinioideae; mimosoid clade; Ingeae   |
| 82    | NC_034991 | <i>Pithecellobium flexicaule</i> (Benth.) J.M.Coult.                         | Fabaceae; Caesalpinioideae; mimosoid clade; Ingeae   |
| 83    | NC_034992 | <i>Samanea saman</i> (Jacq.) Merr.                                           | Fabaceae; Caesalpinioideae; mimosoid clade; Ingeae   |
| 84    | NC_034986 | <i>Adenantha microsperma</i> Teijsm. & Binn.                                 | Fabaceae; Caesalpinioideae; mimosoid clade; Mimoseae |
| 85    | NC_035346 | <i>Dichrostachys cinerea</i> (L.) Wight & Arn.                               | Fabaceae; Caesalpinioideae; mimosoid clade; Mimoseae |
| 86    | NC_028733 | <i>Leucaena trichandra</i> (Zucc.) Urb.                                      | Fabaceae; Caesalpinioideae; mimosoid clade; Mimoseae |
| 87    | NC_034989 | <i>Parkia javanica</i> (Lam.) Merr.                                          | Fabaceae; Caesalpinioideae; mimosoid clade; Mimoseae |
| 88    | NC_034990 | <i>Piptadenia communis</i> Benth.                                            | Fabaceae; Caesalpinioideae; mimosoid clade; Mimoseae |
| 89    | KJ468101  | <i>Prosopis glandulosa</i> Torr.                                             | Fabaceae; Caesalpinioideae; mimosoid clade; Mimoseae |
| 90 #  | KJ468096  | <i>Ceratonia siliqua</i> L.                                                  | Fabaceae; Caesalpinioideae; Umtiza clade;            |
| 91    | NC_036761 | <i>Adenolobus garipensis</i> (E.Mey.) Torre & Hillc.                         | Fabaceae; Cercidoideae; Cercideae                    |
| 92 #  | MF741770  | <i>Cercis chuniana</i> F.P.Metcalf                                           | Fabaceae; Cercidoideae; Cercideae                    |
| 93 #  | KF856619  | <i>Cercis canadensis</i> L.                                                  | Fabaceae; Cercidoideae; Cercideae                    |
| 94    | NC_036744 | <i>Daniellia pilosa</i> (J.Léonard) Estrella                                 | Fabaceae; Detarioideae                               |
| 95    | NC_036743 | <i>Crudia harmsiana</i> De Wild.                                             | Fabaceae; Detarioideae; Detarieae                    |
| 96    | NC_036742 | <i>Guibourtia leonensis</i> J.Léonard                                        | Fabaceae; Detarioideae; Detarieae                    |
| 97 #  | KJ468103  | <i>Tamarindus indica</i> L.                                                  | Fabaceae; Detarioideae; Detarieae                    |
| 98* # | DQ119058  | <i>Cucumis sativus</i> L.                                                    | Cucurbitaceae; Benincaseae                           |
